# Supplementary material for: Enumerating soil biodiversity
Source: PubMed Central journal article supplement — Proc Natl Acad Sci U S A. 2023 Aug 7;120(33):e2304663120. doi: 10.1073/pnas.2304663120 (PMC10437432; doi:10.1073/pnas.2304663120), 2023-08-07
Supplement: pnas.2304663120.sapp.pdf [file pnas.2304663120.sapp.pdf]

1 **Supporting information**

2  
3 **Enumerating soil biodiversity**

4 Mark A. Anthony<sup>1, 2, †</sup>, Franz S. Bender<sup>1, 3</sup>, Marcel G.A. van der Heijden<sup>1, 3</sup>

5  
6 <sup>1</sup>Plant-Soil Interactions Unit, Agroscope, Reckehholz, Switzerland

7 <sup>2</sup>Swiss Federal Institute for Forest, Snow and Landscape Research WSL, Birmensdorf, Switzerland

8 <sup>3</sup>Department of Plant and Microbial Biology, University of Zurich, Zurich, Switzerland

9 †Corresponding author (manthony5955@gmail.com)

10  
11  
12  
13  
14  
15  
16  
17  
18  
19  
20  
21  
22  
23  
24  
25  
26  
27  
28  
29  
30  
31  
32  
33  
34  
35  
36  
37  
38  
39  
40  
41  
42  
43  
44  
45  
46  
47  
48  
49  
50  
51  
52  
53  
54  
55  
56  
57  
58  
59  
60

61 **Table S1. Fraction of protist life so far identified in different ecosystem types across the globe**  
62 **from dataset 1.** The fraction of observed protist 18S rDNA amplicon sequence variants separated by  
63 ecosystem types. All samples were rarified to 1,000 sequences per sample, and observed species  
64 richness is shown. The percent of ecosystem-specific species richness was calculated as the  
65 proportion of richness within an ecosystem divided by the total observed species richness. Raw data  
66 comes from Xiong et al. (2021) (1).  
67  
68

| Ecosystem | Richness | Richness prop. |
|-----------|----------|----------------|
| Citywater | 64       | 0.112          |
| Lake      | 68       | 0.120          |
| Marine    | 195      | 0.343          |
| Soils     | 242      | 0.425          |

69  
70  
71  
72  
73  
74  
75  
76  
77  
78  
79  
80  
81  
82  
83  
84  
85  
86  
87  
88  
89  
90  
91  
92  
93  
94  
95  
96  
97  
98  
99  
100  
101  
102  
103  
104  
105  
106  
107  
108  
109  
110  
111  
112  
113

114 **Table S2. Fraction of protist life so far identified in different ecosystem types across the globe**  
115 **from dataset 2.** The fraction of observed protist 18S rDNA operational taxonomic units clustered  
116 using SWARM and separated by ecosystem types. All samples were rarified to 10,000 sequences per  
117 sample, and observed species richness is shown. The percent of ecosystem-specific species richness  
118 was calculated as the proportion of richness within an ecosystem divided by the total observed  
119 species richness. Raw data comes from Singer et al. (2021) (2).  
120

| Ecosystem  | Richness | Richness prop. |
|------------|----------|----------------|
| Marine     | 12540    | 0.311          |
| Freshwater | 11490    | 0.285          |
| Soil       | 16337    | 0.405          |

121  
122  
123  
124  
125  
126  
127  
128  
129  
130  
131  
132  
133  
134  
135  
136  
137  
138  
139  
140  
141  
142  
143  
144  
145  
146  
147  
148  
149  
150  
151  
152  
153  
154  
155  
156  
157  
158  
159  
160  
161  
162  
163  
164  
165  
166

167 **Table S3. Fraction of bacterial life so far identified in different ecosystems across the globe**  
 168 **from dataset 1.** The fraction of observed bacterial 97% 16S rDNA sequence similarity operational  
 169 taxonomic units (OTUs) was calculated using the SILVA database separated by ecosystem type. The  
 170 % of total shows the proportion of bacterial OTUs specific to each ecosystem after accounting for  
 171 variation in the number of sequences. Raw data comes from Schloss et al. (2016) (3).  
 172

| <b>Ecosystem</b>            | <b>Sequences</b> | <b>OTUs</b> | <b>OTUs/Seq</b> | <b>Prop. of OTUs</b> |
|-----------------------------|------------------|-------------|-----------------|----------------------|
| Aerosol                     | 3472             | 1068        | 0.308           | 0.151                |
| Aquatic                     | 214085           | 43935       | 0.205           | 0.101                |
| Built                       | 108799           | 30012       | 0.276           | 0.135                |
| Plant-associated (root)     | 19695            | 5052        | 0.257           | 0.126                |
| Plant-associated (not root) | 14645            | 4602        | 0.314           | 0.154                |
| Soil                        | 74870            | 23333       | 0.312           | 0.153                |
| Host-associated (not plant) | 804585           | 50565       | 0.063           | 0.031                |
| Other                       | 19414            | 5930        | 0.305           | 0.150                |
| Total Soil                  | 94565            | 28385       | 0.568           | 0.279                |

173  
 174  
 175  
 176  
 177  
 178  
 179  
 180  
 181  
 182  
 183  
 184  
 185  
 186  
 187  
 188  
 189  
 190  
 191  
 192  
 193  
 194  
 195  
 196  
 197  
 198  
 199  
 200  
 201  
 202  
 203  
 204  
 205  
 206  
 207  
 208  
 209  
 210  
 211  
 212

213  
214  
215  
216  
217  
218  
219  
220  
221

**Table S4. Fraction of prokaryotic life so far identified in different ecosystem types across the globe from dataset 2.** The fraction of observed bacterial and archaeal 16S rDNA amplicon sequence variants calculated using data from the Earth Microbiome Project separated by ecosystem type. All samples were rarified to 5,000 sequences per sample, and observed species richness is shown. The percent of ecosystem-specific species richness was calculated as the proportion of richness within an ecosystem divided by the total observed species richness. Raw data comes from Thompson et al. (2017) (4).

| Ecosystem             | Richness | Richness prop. |
|-----------------------|----------|----------------|
| Aerosol (non-saline)  | 272      | 0.037          |
| Animal corpus         | 38       | 0.005          |
| Animal distal gut     | 333      | 0.045          |
| Animal proximal gut   | 173      | 0.023          |
| Animal secretion      | 135      | 0.018          |
| Animal surface        | 218      | 0.029          |
| Hypersaline (saline)  | 282      | 0.038          |
| Plant corpus          | 81       | 0.011          |
| Plant rhizosphere     | 1397     | 0.188          |
| Plant surface         | 173      | 0.023          |
| Sediment (non-saline) | 1178     | 0.158          |
| Sediment (saline)     | 880      | 0.118          |
| Soil (non-saline)     | 970      | 0.131          |
| Surface (non-saline)  | 312      | 0.042          |
| Surface (saline)      | 349      | 0.047          |
| Water (non-saline)    | 447      | 0.060          |
| Water (saline)        | 194      | 0.026          |
| All soil              | 2367     | 0.319          |

222  
223  
224  
225  
226  
227  
228  
229  
230  
231  
232  
233  
234  
235  
236  
237  
238  
239  
240  
241  
242  
243  
244  
245

246  
247  
248  
249  
250  
251  
252  
253  
254

**Table S5. Fraction of bacterial life so far identified in different ecosystem types across the globe from dataset 3.** The fraction of observed bacterial 'phylotypes' defined as identical groups of PCR products based on 16S rDNA clone libraries in different ecosystem types, including soil. Two non-parametric estimates of species richness are included ACE and Chao1. The *n* columns shows the number of libraries available, and we corrected predictions of species richness using *n* (ACE/*n*, Chao1/*n*). We then calculated the proportion of species richness for ACE and Chao1 in each ecosystem type and computed the average proportion. Raw data comes from Kemp and Aller (2004) (5).

| Ecosystem           | <i>n</i> | ACE | Chao1 | ACE/ <i>n</i> | Chao1/ <i>n</i> | ACE prop. | Chao1 prop. | Average prop. |
|---------------------|----------|-----|-------|---------------|-----------------|-----------|-------------|---------------|
| Bacterioplankton    | 51       | 69  | 50    | 1.353         | 0.980           | 0.015     | 0.014       | 0.014         |
| Biofilms            | 30       | 60  | 44    | 2.000         | 1.467           | 0.022     | 0.020       | 0.021         |
| Gas hydrates        | 6        | 91  | 42    | 15.167        | 7.000           | 0.165     | 0.098       | 0.131         |
| Groundwater         | 17       | 114 | 81    | 6.706         | 4.765           | 0.073     | 0.067       | 0.070         |
| Hyperthermal        | 18       | 82  | 38    | 4.556         | 2.111           | 0.050     | 0.029       | 0.040         |
| Sediment            | 30       | 107 | 70    | 3.567         | 2.333           | 0.039     | 0.033       | 0.036         |
| Suspended particles | 8        | 51  | 33    | 6.375         | 4.125           | 0.069     | 0.058       | 0.064         |
| Digestive systems   | 18       | 104 | 129   | 5.778         | 7.167           | 0.063     | 0.100       | 0.082         |
| Compost             | 6        | 164 | 124   | 27.333        | 20.667          | 0.298     | 0.289       | 0.293         |
| Soils               | 19       | 293 | 376   | 15.421        | 19.789          | 0.168     | 0.276       | 0.222         |
| Bioreactors         | 22       | 79  | 26    | 3.591         | 1.182           | 0.039     | 0.017       | 0.028         |

255  
256  
257  
258  
259  
260  
261  
262  
263  
264  
265  
266  
267  
268  
269  
270  
271  
272  
273  
274  
275  
276  
277  
278  
279  
280  
281  
282  
283  
284  
285  
286  
287  
288

289  
290  
291  
292  
293  
294  
295

**Table S6. Fraction of archaeal life so far identified in different ecosystems across the globe in dataset 1.** The fraction of observed archaeal 97% 16S rDNA sequence similarity operational taxonomic units (OTUs) was calculated using the SILVA database separated by ecosystem type. The % of total shows the proportion of archaeal OTUs specific to each ecosystem after accounting for variation in the number of sequences. Raw data comes from Schloss et al. (2016) (3).

| <b>Ecosystem</b>            | <b>Sequences</b> | <b>OTUs</b> | <b>OTUs/Seq</b> | <b>Prop of OTUs</b> |
|-----------------------------|------------------|-------------|-----------------|---------------------|
| Aquatic                     | 34400            | 4838        | 0.141           | 0.087               |
| Built                       | 7286             | 1219        | 0.167           | 0.104               |
| Plant-associated (root)     | 200              | 61          | 0.305           | 0.189               |
| Plant-associated (not root) | 22               | 7           | 0.318           | 0.198               |
| Soil                        | 7906             | 1125        | 0.142           | 0.088               |
| Host-associated (not plant) | 1090             | 348         | 0.319           | 0.198               |
| Other                       | 2565             | 559         | 0.218           | 0.135               |
| Total Soil                  | 8106             | 1186        | 0.447           | 0.278               |

296  
297  
298  
299  
300  
301  
302  
303  
304  
305  
306  
307  
308  
309  
310  
311  
312  
313  
314  
315  
316  
317  
318  
319  
320  
321  
322  
323  
324  
325  
326  
327  
328  
329  
330  
331  
332  
333  
334  
335

336  
337  
338  
339  
340  
341  
342  
343

**Table S7. Fraction of archaeal life so far identified in different ecosystem types across the globe from dataset 2.** The fraction of observed archaeal 'phylotypes' defined as identical groups of PCR products based on 16S rDNA clone libraries in different ecosystem types, including soil. Species richness was estimated after subsampling to a library size of 120 clones for each ecosystem type. We then calculated the proportion of observed richness in each ecosystem type. Raw data is from Auguet et al. (2010) (6).

| Ecosystem                           | Richness | Richness prop. |
|-------------------------------------|----------|----------------|
| soil                                | 64       | 0.103          |
| marine plankton                     | 77       | 0.124          |
| freshwater sediment                 | 81       | 0.130          |
| marine sediment                     | 90       | 0.145          |
| hypersaline planktonic environments | 97       | 0.156          |
| hydrothermal vents                  | 101      | 0.163          |
| freshwater plankton                 | 111      | 0.179          |

344  
345  
346  
347  
348  
349  
350  
351  
352  
353  
354  
355  
356  
357  
358  
359  
360  
361  
362  
363  
364  
365  
366  
367  
368  
369  
370  
371  
372  
373  
374  
375  
376  
377  
378  
379  
380  
381  
382  
383  
384



385  
386  
387  
388  
389  
390  
391

**Table S8. Fraction of viral life so far identified in different ecosystems across the globe.** The fraction of observed metagenomic viral contigs (mVC) identified across different ecosystem types after normalizing for variation in sequencing depth (megabases per sample: Mb). The % of mVC shows the proportion of mVCs specific to each ecosystem after accounting for variation in the number sequences. Raw data was compiled from sources in Paez-Espino et al. (2016) (7).

| Ecosystem                      | Megabases (Mb) | mVC   | Samples | mVC/Mb | % of mVC |
|--------------------------------|----------------|-------|---------|--------|----------|
| Engineered                     | 10486          | 7970  | 154.000 | 0.760  | 8.701    |
| Freshwater                     | 96314          | 20576 | 178.000 | 0.214  | 2.446    |
| Host-associated (human)        | 10349          | 30849 | 664.000 | 2.981  | 34.123   |
| Host-associated (other)        | 23452          | 5596  | 99.000  | 0.239  | 2.731    |
| Host-associated (plants)       | 3909           | 1233  | 91.000  | 0.315  | 3.611    |
| Marine                         | 29602          | 50587 | 397.000 | 1.709  | 19.562   |
| Non-marine Saline and Alkaline | 2825           | 4538  | 41.000  | 1.606  | 18.388   |
| Terrestrial (other)            | 1659           | 343   | 32.000  | 0.207  | 2.367    |
| Terrestrial (soil)             | 5794           | 2840  | 64.000  | 0.490  | 5.611    |
| Thermal springs                | 1828           | 393   | 49.000  | 0.215  | 2.461    |

392  
393  
394  
395  
396  
397  
398  
399  
400  
401  
402  
403  
404  
405  
406  
407  
408  
409  
410  
411  
412  
413  
414  
415  
416  
417  
418  
419  
420  
421  
422  
423  
424  
425  
426  
427

428  
429  
430  
431

**Table S9. List of non-soil inhabiting Enchytraeid species.** The species listed here were identified from the genera outlined in van van Vliet (1999)(8).

---

|                                                            |
|------------------------------------------------------------|
| <i>Grania acanthochaeta</i> Rota & Erséus, 1996            |
| <i>Grania algida</i> Rota & Erséus, 1996                   |
| <i>Grania alliata</i> Coates & Stacey, 1993                |
| <i>Grania americana</i> Kennedy, 1966                      |
| <i>Grania angustinasus</i> Rota & Erséus, 1996             |
| <i>Grania antarctica</i> Rota & Erséus, 1996               |
| <i>Grania aquitana</i> Rota & Erséus, 2003                 |
| <i>Grania ascophora</i> Coates, 1990                       |
| <i>Grania atlantica</i> Coates & Erséus, 1985              |
| <i>Grania bekkouchei</i> Prantoni, De Wit & Erséus, 2016   |
| <i>Grania bermudensis</i> Erséus & Lasserre, 1976          |
| <i>Grania brasiliensis</i> Prantoni, De Wit & Erséus, 2016 |
| <i>Grania breviductus</i> De Wit, Rota & Erséus, 2009      |
| <i>Grania bykane</i> Coates, 1990                          |
| <i>Grania canaria</i> Rota & Erséus, 2003                  |
| <i>Grania capensis</i> Prantoni, De Wit & Erséus, 2016     |
| <i>Grania carchinii</i> Rota & Erséus, 1996                |
| <i>Grania carolinensis</i> Prantoni, De Wit & Erséus, 2016 |
| <i>Grania chilensis</i> Prantoni, De Wit & Erséus, 2016    |
| <i>Grania cinctura</i> De Wit & Erséus, 2007               |
| <i>Grania colorata</i> De Wit, Rota & Erséus, 2009         |
| <i>Grania conjuncta</i> Coates & Stacey, 1993              |
| <i>Grania crassiducta</i> Coates, 1990                     |
| <i>Grania cryptica</i> Prantoni, De Wit & Erséus, 2016     |
| <i>Grania curta</i> De Wit & Erséus, 2007                  |
| <i>Grania darwinensis</i> (Coates & Stacey, 1997)          |
| <i>Grania dolichura</i> Rota & Erséus, 2000                |
| <i>Grania ersei</i> Coates, 1990                           |
| <i>Grania eurystila</i> Coates & Stacey, 1997              |
| <i>Grania fiscellata</i> De Wit & Erséus, 2007             |
| <i>Grania fortunata</i> Rota & Erséus, 2003                |
| <i>Grania fustata</i> De Wit & Erséus, 2007                |
| <i>Grania galbina</i> De Wit & Erséus, 2007                |
| <i>Grania hastula</i> Coates, 1990                         |
| <i>Grania hinojosai</i> Prantoni, De Wit & Erséus, 2016    |
| <i>Grania hirsuticauda</i> Rota & Erséus, 1996             |
| <i>Grania homochaeta</i> De Wit, Rota & Erséus, 2009       |
| <i>Grania hongkongensis</i> Erséus, 1990                   |
| <i>Grania hylae</i> Locke & Coates, 1999                   |
| <i>Grania hyperoadenia</i> Coates, 1990                    |
| <i>Grania incerta</i> Coates & Erséus, 1980                |
| <i>Grania inermis</i> Erséus, 1990                         |
| <i>Grania integra</i> Coates & Stacey, 1997                |
| <i>Grania lasserrei</i> Rota & Erséus, 1997                |
| <i>Grania laevis</i> Locke & Coates, 1999                  |
| <i>Grania levis</i> Coates & Erséus, 1985                  |
| <i>Grania longiducta</i> Erséus & Lasserre, 1976           |
| <i>Grania longistyla</i> Coates & Stacey, 1993             |
| <i>Grania macrochaeta</i> (Pierantoni, 1901)               |
| <i>Grania maricola</i> Southern, 1913                      |
| <i>Grania mauretanica</i> Rota & Erséus, 2003              |
| <i>Grania mira</i> Locke & Coates, 1998                    |
| <i>Grania monochaeta</i> (Michaelsen, 1888)                |
| <i>Grania monospermatheca</i> Erséus & Lasserre, 1976      |
| <i>Grania novacaledonia</i> De Wit & Erséus, 2007          |
| <i>Grania ocarina</i> Rota, Erséus & Wang, 2003            |
| <i>Grania occulta</i> De Wit & Erséus, 2010                |
| <i>Grania ovitheca</i> Erséus, 1977                        |
| <i>Grania pacifica</i> Shurova, 1979                       |
| <i>Grania papillata</i> De Wit & Erséus, 2007              |
| <i>Grania papillinasus</i> Rota & Erséus, 2003             |
| <i>Grania parvitheca</i> Erséus, 1980                      |
| <i>Grania paucispina</i> (Eisen, 1904)                     |
| <i>Grania postclitellochaeta</i> (Knöllner, 1935)          |
| <i>Grania principissae</i> (Michaelsen, 1907)              |
| <i>Grania pusilla</i> Erséus, 1974                         |
| <i>Grania quaerens</i> Rota, Wang & Erséus, 2007           |
| <i>Grania reducta</i> Coates & Erséus, 1985                |
| <i>Grania regina</i> De Wit, Rota & Erséus, 2009           |
| <i>Grania roscoffensis</i> Lasserre, 1967                  |

---

---

*Grania simonae* Prantoni, De Wit & Erséus, 2016  
*Grania sperantia* Rota, Wang & Erséus, 2007  
*Grania stephensoniana* Rota & Erséus, 1997  
*Grania stilifera* Erséus, 1990  
*Grania tasmaniae* Rota & Erséus, 2000  
*Grania torosa* Rota & Erséus, 2003  
*Grania trichaeta* Jamieson, 1977  
*Grania unitheca* Prantoni, De Wit & Erséus, 2016  
*Grania vacivasa* Coates & Stacey, 1993  
*Grania variochaeta* Erséus & Lasserre, 1976  
*Grania vikinga* Rota & Erséus, 2003  
*Aspidodrilus kesalli*  
*Aspidodrilus eburneensis*  
*Barbidrilus paucisetus*  
*Randidrilus* Coates & Erséus, 1985  
*Randidrilus codensis* (Lasserre, 1971)  
*Randidrilus quadrithecatus* Coates & Erséus, 1985  
*Randidrilus westheidei* (Kossmagk-Stephan, 1983)  
*Stephensiella* Cernosvitov, 1934  
*Stephensiella Lastochkin*, 1935 accepted as *Potamodrilus Lastochkin*, 1935  
*Stephensiella fluvialis* Lastochkin, 1935 accepted as *Potamodrilus fluvialis* (Lastochkin, 1935)  
*Stephensiella marina* (Moore, 1902)  
*Stephensiella sterreri* (Lasserre & Erséus, 1976)  
*Stephensiella trevori* (Coates, 1980)  
*Pelmatodrilus*  
*Propappus glandulosus* Michaelsen, 1905  
*Propappus volki* Michaelsen, 1916  
*Propappus arhyncotus* Sokolskaja, 1972

---

432  
433  
434  
435  
436  
437  
438  
439  
440  
441  
442  
443  
444  
445  
446  
447  
448  
449  
450  
451  
452  
453  
454  
455  
456  
457  
458  
459  
460  
461  
462  
463  
464  
465  
466  
467  
468  
469

**Table S10.** Footnotes of methodological details for the estimations of biodiversity shown outside of the parentheses using letters in Table 1.

<sup>a</sup>Bagyaraj et al. (2016) (9) claims 50% of nematodes live in soil. Seven percent of the currently described  $2.7 \times 10^4$  Nematoda species live in fresh-water(10), and 50% live in marine environments (9). If this 57% reflects the non-soil inhabiting species, then we can expect 43% of Nematoda biodiversity to be found in soil (or inside animals and plants that live in soil), an estimate not far off from the expert opinion of Bagyaraj et al. (2016) (9). We therefore use 43% for the lower prediction, 50% for the upper prediction, and the average of the two for the central prediction 46.5%. We also note that this value could be an under-estimate since so few studies have used appropriate molecular tools to characterize nematode biodiversity at a global scale.

<sup>b</sup>This value was calculated using data from tropical tree canopies. This is expected to capture most Arthropoda life since tropical species make the largest contribution to global species richness. There is a ratio of 162 host-specific beetles per tree species, which suggests that there may be as many as  $3 \times 10^7$  tropical arthropods (11). Yet, this value has been the subject of debate as an over-estimation. Others suggests that only 13.5% of beetle species are actually host specific (12), and they use this percentage to extrapolate total species richness based on the total number of rainforest tree species, which is potentially more accurate (13). Indeed, some report that an estimate of  $3 \times 10^7$  species has a  $<0.00001$  probability of being true(14). Further, some have suggested that the diversity in soil may be an order of magnitude higher than that of tree canopies, ultimately providing a solid basis to be critical of Erwin (1982)'s (12) estimation. So far, few studies assessed the richness of arthropods in the soil and this number could be higher. Note that the upper Insecta value is higher than the total Arthropoda estimate even though insects are a group of arthropods. This can occur when two highly uncertain and speculative estimates are provided, and we are unable to differentiate which may be more accurate than the other, so we retain both. We emphasize this uncertainty using questions marks (see below).

<sup>c</sup>These are estimates derived from the proportion of life in soil that has already been predicted at the lower end. The lower end prediction was used to calculate the central and upper predictions of soil life using the global species prediction. Where there was a lower and central prediction already for the soil, the mean proportion of soil life for both was used to calculate the upper estimate.

<sup>d</sup>Bagyaraj et al. (2016) (9) claims that there are 50,000 mites (a group of Arachnida) species known to live in soil based on expert opinion. This value does not include all Arachnida inhabiting soil. Nevertheless, this value is similar to the lower value estimate proposed by Decaëns et al. (2006) (15), and it is the best estimate currently available.

<sup>e</sup>From current knowledge of aquatic collembola inventories and extrapolation techniques, there are 525 species estimated (414 freshwater, 109 marine, and 2 marine/freshwater species (16)). This value can therefore be subtracted to derive the value from the lower and upper estimates of total numbers to generate soil-dwelling predictions.

<sup>f</sup>All termites but the Kalotermitidae and Termopsinae live in association with soil (17). Globally, there are 450 Kalotermitidae and 20 Termopsidae. Thus, we can subtract 470 from the global species estimates to derive the soil-inhabiting species.

<sup>g</sup>Ryder et al. (2010) (18) found that ca. 50% of ant species live in or on soil in a western Amazonian rainforest of Ecuador. This is a biodiversity hotspot in the tropics and may generally represents above versus belowground ant habitat stratification. To ascertain the low- and high-end estimates of ant richness, we can assume 50% of the global estimate.

<sup>h</sup>A compilation of species was identified in the literature (see SI Appendix, Table S9) for all the soil inhabiting genera listed in van Vliet (2000) (8). We identified a total of 98 species, which we can then subtracted from the total species list to derive estimates of soil-dwelling species.

<sup>i</sup>This estimate is for total terrestrial biodiversity and includes species that live on or within soil litter and other terrestrial ecosystems, though sampling of mollusks is typically done by hand or after collecting micro-mollusks in litter and soil passed through a 5 mm sieve (e.g. (19)), suggesting a primarily soil origin.

<sup>j</sup>Current estimates suggest that 7.2-11.4% of angiosperm families are entirely or partially aquatic(20). There are also approximately 31,311 vascular epiphytes in the world, 90% of which are angiosperms (21). Assuming that 9.3% of angiosperm species are aquatic, this can be subtracted from the angiosperm component of total plant biodiversity (79% of known plant species are angiosperms (22)). Seventy-nine percent of total plant diversity (low end total = 380,000) = 300,200 (angiosperms); 9.3% of angiosperms = 27,920 (aquatic angiosperms); aquatic angiosperms (27,900) + epiphytes (31,311) = 59,211 non-soil inhabiting plant species. Subtracting this value allows prediction of soil-inhabiting plant species. Assuming there are 537,000 plant species gives us  $(0.79 * 537,000 = 424,230$  angiosperms;  $0.093 * 424,230 = 39,453$ ;  $537,000 - (39,453 + 31,311) = 466,236$ ). Since these plants have 22-67% of their biomass in soil(11) and have seeds or spores that germinate in soil, we can consider them soil inhabiting.

<sup>k</sup>Microbe is an ambiguously used term in the literature. Here, it is used to represent studies that include bacteria, archaea, and fungi, but not studies that strictly consider bacteria. In the lower and central estimates, this is the sum of bacteria, archaea, and fungi estimates. If one of the bacterial, archaeal, or fungal predictions are not available, this total is not calculated (i.e. upper, soil microbial diversity). This number should also include protists (23) but because the studies included here to estimate the upper range of microbial biodiversity did not include protists, we also did not add protists in order to make comparisons across the lower, central, and upper predictions equivalent. Note that one can simply add the protist value to the total microbe value in order to estimate total microbe richness including protists.

<sup>l</sup>There are a few hundred to a few thousand viral protein clusters in the pan-genome of individual bacterial species (24) and hundred to thousands of unique viral operational taxonomic units (vOTUs) found per bacterial species (Figure S1A). Assuming most viruses do not infect multiple hosts or share genes across host species (Figure S1A), one can multiply the total number of microbes by the number of viral taxa found per species (i.e. here we choose an intermediate value of 1,000) to estimate an upper prediction of phage diversity. Using the upper estimate of bacterial diversity ( $3.7 \times 10^9$ ) and a ratio of 1000:1, we predicted the upper and lower ranges of viral diversity.

<sup>m</sup>Based on the distribution of vOTU richness across ecosystem types to-date (Figure S1B), we found that 9.9% of all vOTUs were from soil (Figure S1C). We arrived at a slightly smaller estimate of 5.6% using an independent dataset (see main text; SI Appendix, Table S8). We therefore estimate that a minimum of 6-10% of viral diversity is found in soil, though this number is likely to be much higher. Because the proportion of bacterial life in soil is ca. 43%, phage should theoretically track this estimate. We therefore use a 6% lower, 9.9% central, and 43% upper estimate (our central estimate for the proportion of bacterial life in soil, used here because we assume most soil viruses are phage) to compute the proportion of viral life in soil relative to global estimates.

<sup>n</sup>Wien (2021) (25) re-analyzed data from Larsen et al. (2017) (26) using updated concepts of host specificity, and it shows that the number of unique bacterial species found per insect species is in the 1,000's range. They then use this number to re-estimate global species predictions for all groups, but highlighting bacteria.

<sup>o</sup>We analyzed three global prokaryotic datasets to estimate the proportion of observed bacterial species in soil versus other ecosystem types. We first re-analyzed data from the SILVA database(27) with meta-data organized by others (3) to estimate that 27.9% of all 97% OTUs have been observed in soil, after correcting for sequencing effort (see SI Appendix, Table S3). We then repeated this process using data from the Earth Microbiome Project (4) and found 32.9% of amplicon sequence variants, an even higher resolution molecular species concept, have been

554  
555  
556  
557  
558  
559  
560  
561  
562  
563  
564  
565  
566  
567  
568  
569  
570  
571  
572  
573  
574  
575  
576  
577  
578  
579  
580  
581  
582  
583  
584  
585  
586  
587  
588  
589  
590  
591  
592  
593  
594  
595  
596  
597  
598  
599  
600  
601  
602  
603  
604  
605  
606  
607  
608  
609  
610  
611  
612  
613  
614  
615  
616  
617  
618  
619  
620  
621  
622  
623  
624  
625

observed in soil (SI Appendix, Table S4), and then a third time using data from an earlier meta-analysis (5) to find 22.2% of OTUs have been observed in soil (SI Appendix, Table S5). All three estimates are substantially lower than an initial estimate of 88.8% calculated using theoretical statistical approaches(28). Curtis et al. (2002) (28) predicts that soil diversity would be  $4 \times 10^6$  while total diversity would be  $4.5 \times 10^6$ . This is equivalent to soils containing 88.8% of the bacterial diversity. An estimated total of  $4.5 \times 10^6$  is also not very different from the  $4.3 \times 10^6$  estimate of Louca et al. (2019)(29). Estimates of the proportion of bacterial life in soil therefore range between 22-89% with an average (hereafter: central estimate) of 43%. We therefore used 22.2, 43, and 88.8% (average = 51%, as shown in Figure 2) as our low, central, and upper predictions of the proportion of bacterial species in soil.

<sup>p</sup> This value is based on extrapolation of fungal species observations in typical insect hosts generalized to include all animals. It does not thoroughly account for overlap among taxa across animal hosts nor does it include other hosts of fungi, such as plants. It also does not account for free-living fungi.

<sup>q</sup>Using values from Schmit and Mueller (2007) (30) there are estimated 3,000 lichenicolous fungi, 8,400 aquatic fungi, 20,000 arthropod associated fungi, 1,200 microsporidians (mostly animal parasites) which equals 32,600 non-soil dwelling fungal taxa. We estimated that animal-associated fungal diversity is  $10\times$  lower than soil fungal diversity using data presented in Peay et al. (2016) (31). Thus, if we account for the 32,600 non-soil dwelling fungi, we can assume that 10% of remaining fungal diversity is animal-associated. If these fungi lack dual-capacities to live in animal hosts and the soil environment, an assumption that we know is not entirely correct, then there are  $2.2 \times 10^5$  and  $6.2 \times 10^5$  species that do not live in soil at the low and central estimates, respectively. It is worth noting that soil biodiversity would be even higher if animal-associated species were included as facultative saprotrophs in soil. Subtracting the arthropod-associated and microsporidians (21,200) further constrains this value to 198,800 and 598,800 non-soil inhabiting fungi at the lower and central estimates, respectively. Subtracting total fungal diversity from these estimates derives soil-inhabiting fungal biodiversity. Note that this derivation was not applied for the upper prediction because this estimate is already based on arthropod-associated predictions of fungal biodiversity. It has received considerable scrutiny, but it is the highest predicted estimate to date, theoretically possible, and therefore included as an upper limit in our study.

<sup>r</sup>Louca et al. (2019) (29) identified a range of  $7$  to  $14 \times 10^4$  archaeal OTUs based on the V4 region using the tWLRM and breakaway estimation methods, respectively. They also find that there are 2.7 times more OTUs discovered when analyzing the full-length 16S region relative to the V4 region. Thus, estimates were multiplied by 2.7 to reach the final value.

<sup>s</sup>We analyzed two independent datasets to estimate the proportion of observed archaeal species in soil versus other ecosystem types. We show that the proportion of Archaea OTUs in soil to range from 10.3-27.8% with average of 19.1% (Tables S6-7). We therefore use 10.3, 19.1, and 27.8% as our lower, central, and upper soil proportion estimates.

<sup>t</sup>To estimate the proportion of protists in soil, we calculated the percent of species observed in soil relative to other ecosystem types using two independent, global datasets. We found 40.4% and 42.5% of the protist taxa were found in soil compared to aquatic and marine ecosystem types in our two datasets (1, 2). We therefore used the low percent in soil (40.4) and the average of two (41.45) to compute the fraction of protist species found in soil relative to global predictions. Note that we did not do this for the upper prediction of protist diversity in soil because this estimate is based on arthropod-associated predictions of protist biodiversity, and it has received considerable scrutiny. It is the highest predicted estimate to date, theoretically possible, and therefore included as an upper limit in our study.

<sup>?</sup>Denotes that this estimate is highly speculative and controversial in the literature. Note that this is different from normal-sized question marks.

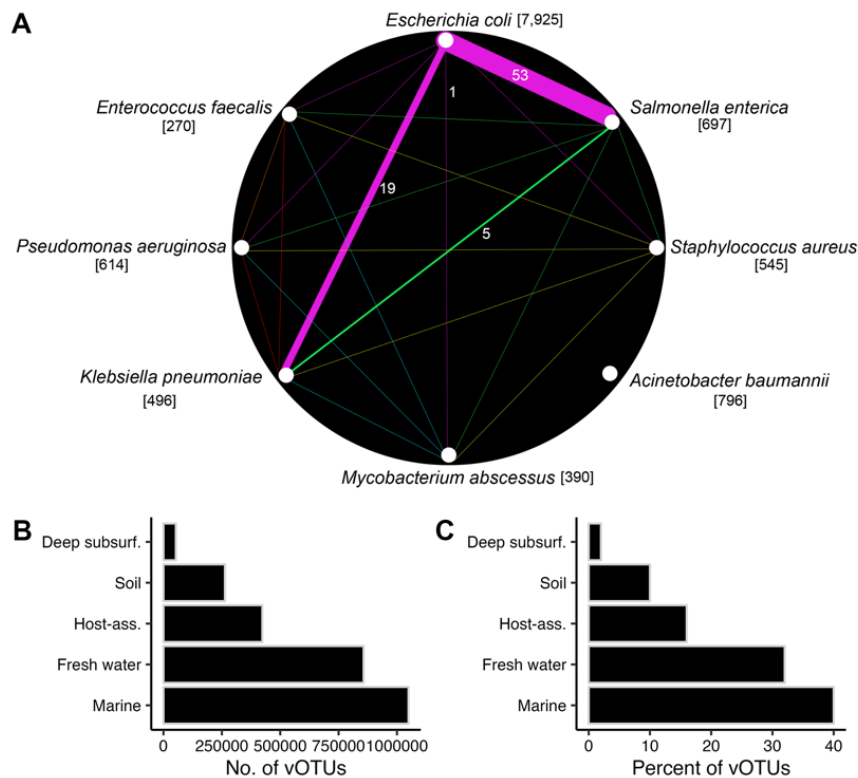

627  
 628 **Figure S1.** Overview of viral operational taxonomic unit (vOTU)s identified and shared within bacterial  
 629 hosts and across ecosystem types. **(A)** Co-occurrences of shared vOTUs among bacterial host species  
 630 with >1,000 viral metagenomes in the IMG/VR database (v4.1, IMG\_VR\_2022-09-20\_7.1). Values  
 631 along lines and in square brackets show the number of vOTUs shared among bacterial hosts and the  
 632 total number of vOTUs thus identified within each host species, respectively. **(B)** The number of unique  
 633 vOTUs identified to-date across deep subsurface, soil, host-associated, fresh water, and marine  
 634 ecosystems, and **(C)** the percent of vOTUs identified to-date in each ecosystem type. Abbreviations:  
 635 Deep subsurf. = deep subsurface; Host-ass. = host-associated

636  
 637  
 638  
 639  
 640  
 641  
 642  
 643  
 644  
 645  
 646  
 647  
 648  
 649  
 650  
 651  
 652  
 653  
 654  
 655  
 656  
 657  
 658  
 659

660  
661  
662  
663

## References

664  
665

1. W. Xiong, *et al.*, A global overview of the trophic structure within microbiomes across ecosystems. *Environment International* **151**, 106438 (2021).

666  
667

2. D. Singer, *et al.*, Protist taxonomic and functional diversity in soil, freshwater and marine ecosystems. *Environment International* **146**, 106262 (2021).

668  
669

3. P. D. Schloss, R. A. Girard, T. Martin, J. Edwards, J. C. Thrash, Status of the archaeal and bacterial census: an update. *MBio* **7**, e00201-16 (2016).

670  
671

4. L. R. Thompson, *et al.*, A communal catalogue reveals Earth's multiscale microbial diversity. *Nature* **551**, 457–463 (2017).

672  
673

5. P. F. Kemp, J. Y. Aller, Bacterial diversity in aquatic and other environments: what 16S rDNA libraries can tell us. *FEMS Microbiology Ecology* **47**, 161–177 (2004).

674  
675

6. J.-C. Auguet, A. Barberan, E. O. Casamayor, Global ecological patterns in uncultured Archaea. *ISME J* **4**, 182–190 (2010).

676  
677  
678

7. D. Paez-Espino, *et al.*, Uncovering Earth's virome. *Nature* **536**, 425–430 (2016).

8. P. C. J. Van Vliet, Enchytraeids. *Handbook of Soil Science* **58**, C-70–76 (1999).

9. D. Bagyaraj, C. Nethravathi, K. Nitin, "Soil biodiversity and arthropods: Role in soil fertility" in *Economic and Ecological Significance of Arthropods in Diversified Ecosystems*, (Springer, 2016), pp. 17–51.

679  
680  
681

10. E. Abebe, W. Decraemer, P. De Ley, "Global diversity of nematodes (Nematoda) in freshwater" in *Freshwater Animal Diversity Assessment*, Developments in Hydrobiology., E. V. Balian, C. Lévêque, H. Segers, K. Martens, Eds. (Springer Netherlands, 2008), pp. 67–78.

682  
683

11. H. Ma, *et al.*, The global distribution and environmental drivers of aboveground versus belowground plant biomass. *Nat Ecol Evol* **5**, 1110–1122 (2021).

684  
685

12. T. L. Erwin, Tropical forests: their richness in Coleoptera and other arthropod species. *The Coleopterists Bulletin* (1982).

686  
687

13. G. H. R. Osler, A. J. Beattie, Contribution of oribatid and mesostigmatid soil mites in ecologically based estimates of global species richness. *Austral Ecology* **26**, 70–79 (2001).

688  
689

14. A. J. Hamilton, *et al.*, Quantifying Uncertainty in Estimation of Tropical Arthropod Species Richness. *The American Naturalist* **176**, 90–95 (2010).

690  
691

15. T. Decaëns, J. J. Jiménez, C. Gioia, G. Measey, P. Lavelle, The values of soil animals for conservation biology. *European Journal of Soil Biology* **42**, S23–S38 (2006).

692  
693

16. L. Deharveng, C. A. D'Haese, A. Bedos, "Global diversity of springtails (Collembola; Hexapoda) in freshwater" in *Freshwater Animal Diversity Assessment*, (Springer, 2007), pp. 329–338.

694

17. T. G. Wood, Termites and the soil environment. *Biol Fert Soils* **6**, 228–236 (1988).

695  
696

18. K. T. Ryder Wilkie, A. L. Mertl, J. F. A. Traniello, Species Diversity and Distribution Patterns of the Ants of Amazonian Ecuador. *PLOS ONE* **5**, e13146 (2010).

697  
698

19. T. Waki, Diversity of terrestrial mollusks and their helminths in artificial environments in Yoyogi Park, Tokyo, Japan. *Journal of Asia-Pacific Biodiversity* **10**, 254–256 (2017).

- 699 20. D. E. McAllister, A. L. Hamilton, B. Harvey, E. Don, Global freshwater biodiversity : striving for the  
700 integrity of freshwater ecosystems. *Sea wind: bulletin of Ocean Voice International* **11** (1997).
- 701 21. G. Zotz, P. Weigelt, M. Kessler, H. Kreft, A. Taylor, EpiList 1.0: a global checklist of vascular  
702 epiphytes. *Ecology* **102**, e03326 (2021).
- 703 22. M. J. M. Christenhusz, J. W. Byng, The number of known plants species in the world and its  
704 annual increase. *Phytotaxa* **261**, 201–217 (2016).
- 705 23. D. A. Caron, A. Z. Worden, P. D. Countway, E. Demir, K. B. Heidelberg, Protists are microbes  
706 too: a perspective. *ISME J* **3**, 4–12 (2009).
- 707 24. J. C. Ignacio-Espinoza, S. A. Solonenko, M. B. Sullivan, The global virome: not as big as we  
708 thought? *Current opinion in virology* **3**, 566–571 (2013).
- 709 25. J. J. Wiens, Vast (but avoidable) underestimation of global biodiversity. *PLOS Biology* **19**,  
710 e3001192 (2021).
- 711 26. B. B. Larsen, E. C. Miller, M. K. Rhodes, J. J. Wiens, Inordinate Fondness Multiplied and  
712 Redistributed: the Number of Species on Earth and the New Pie of Life. *The Quarterly Review of*  
713 *Biology* **92**, 229–265 (2017).
- 714 27. C. Quast, *et al.*, The SILVA ribosomal RNA gene database project: improved data processing and  
715 web-based tools. *Nucleic acids research* **41**, D590–D596 (2012).
- 716 28. T. P. Curtis, W. T. Sloan, J. W. Scannell, Estimating prokaryotic diversity and its limits.  
717 *Proceedings of the National Academy of Sciences* **99**, 10494–10499 (2002).
- 718 29. S. Louca, F. Mazel, M. Doebeli, L. W. Parfrey, A census-based estimate of Earth’s bacterial and  
719 archaeal diversity. *PLoS biology* **17**, e3000106 (2019).
- 720 30. J. P. Schmit, G. M. Mueller, An estimate of the lower limit of global fungal diversity. *Biodiversity*  
721 *and Conservation* **16**, 99–111 (2007).
- 722 31. K. G. Peay, P. G. Kennedy, J. M. Talbot, Dimensions of biodiversity in the Earth mycobiome.  
723 *Nature Reviews Microbiology* **14**, 434–447 (2016).
- 724
